# Supplementary material
Source: PubMed Central journal article supplement (PMC3105699)
Supplement: ismej2010127x4.pdf [file ismej2010127x4.pdf]

1     **“*Candidatus* Accumulibacter” Gene Expressions in Response to Dynamic**

2                     **EBPR Conditions**

3                     by Shaomei He and Katherine D. McMahon

4  
5                     **Supplementary Materials**

6  
7     **Supplementary Material Included:**

8     Supplementary Text 1. RT-qPCR primer design for Accumulibacter clades IA and IIA

9     Supplementary Text 2. PCR condition optimization and standard curve generation

10    Supplementary Text 3. Eligibility of absolute quantification of mRNA

11    Supplementary Text 4. Changes in 16S rRNA abundance across a cycle

12    [Supplementary Text 5. Discussion on observed difference in phaA and phaC regulation](#)

13  
14    Table S1

15    Figure S1

16    Figure S2

17    Supplementary Reference

18  
19                    **RT-qPCR primer design for Accumulibacter clades IA and IIA**

20    Twelve primer sets were designed to target genes of interest from both clades IA and IIA

21    Accumulibacter. The metagenome sequencing recovered a nearly complete genome of clade IIA

22    (binned as “*Candidatus* Accumulibacter phosphatis” on IMG/M [[http://img.jgi.doe.gov/cgi-](http://img.jgi.doe.gov/cgi-bin/m/main.cgi)

23    bin/m/main.cgi]), but only retrieved partial sequences from clade IA (Garcia Martin *et al.*, 2006).

24    It was estimated that clades IA and IIA genomes had an average nucleotide sequence divergence

25    of 15% (Kunin *et al.*, 2008). Since these two clades are the closest relatives in the sludge

26 microbial community, non-clade IIA genes that share the highest DNA sequence identity to  
27 clade IIA in the sludge metagenome are likely from clade IA. Table S1 lists the non-clade IIA  
28 genes from the sludge metagenome that have the closest match to clade IIA, as well as non-  
29 *Accumulibacter* genes in Genbank that share the highest DNA sequence identity to clade IIA, as  
30 a comparison. For every gene studied, the percent identity between clade IIA gene and its  
31 homolog from the sludge metagenome is higher than that from the closest non-*Accumulibacter*  
32 match in Genbank. Therefore, these closest homologs of IIA genes in the sludge metagenome are  
33 very likely from clade IA.

34

35

36

### **PCR optimization and standard curve generation**

37 To generate an appropriate positive control for PCR optimization, we selected and pooled a total  
38 of 14 DNA samples with varied relative abundances of clades IA and IIA, collected from the  
39 reactor during a 5-month period. The samples were mixed to generate a community DNA pool  
40 that had a balanced distribution of clades IA and IIA (verified by *ppk1*-targeted qPCR). A 30-  
41 cycle PCR with an annealing temperature gradient range of 58-65°C was performed on the  
42 pooled DNA sample to determine the optimal annealing temperatures for the newly designed  
43 primer sets. The reaction mixtures contained 1X PCR buffer II, 3.0 mM MgCl<sub>2</sub>, 200 μM of each  
44 dNTP, 400 nM of each forward and reverse primer and 0.05 U/μl of AmpliTaq Gold® DNA  
45 polymerase (Applied Biosystems, Foster City, CA). Since the *Accumulibacter* genome has a  
46 high GC content (64%), betaine was added to 0.5 M final concentration as a denaturant to  
47 facilitate the reaction. PCR products were visualized by 2% agarose gel electrophoresis. A single  
48 sharp band at the expected amplicon size was obtained for each individual primer pair, indicating

49 that the amplification was specific. The optimal annealing temperature was determined as the  
50 highest temperature that still resulted in a high intensity band (Table 1).

51 Positive controls for individual primer sets were generated by PCR amplification with  
52 corresponding primer sets, using the pooled sludge DNA sample described above. PCR products  
53 were purified (PureLink™ PCR purification kit ,Invitrogen) and the mass concentration of PCR  
54 products was determined (PicoGreen dsDNA quantification kit, Invitrogen). Copy number was  
55 calculated based on mass concentration and the average molecular weight of each individual  
56 PCR amplicon. Six-point calibration curves for qPCR were produced by tenfold serial dilution of  
57 positive controls in duplicate, ranging from  $10^3$  to  $10^8$  target copies per reaction. Quantification  
58 was performed using the iCycler™ iQ optical system software Version 3.0a (Biorad). PCR  
59 amplification efficiencies were estimated from the standard curve slope by the formula  $10^{-1/\text{slope}}$ -  
60 1.

61

62

63

### **Eligibility of absolute quantification of mRNA**

64 Accurate comparison of gene expression between samples using RT-qPCR often requires  
65 normalizing unwanted variations introduced during procedures such as RNA extraction and  
66 reverse transcription. Usually a housekeeping gene that has constant expression levels among  
67 different samples is used as a reference gene or an internal control to quantify the relative change  
68 of target genes (referred to as “relative quantification”). However, choosing an appropriate  
69 housekeeping gene that does not vary in all samples under different conditions can be very  
70 difficult, even in well-studied bacteria, such as *Pseudomonas* and *Staphylococcus* (Savli *et al.*,

71 2003; Vandecasteele *et al.*, 2001). As we know much less about *Accumulibacter*, it is more  
72 challenging to select such an internal standard.

73 Quantifications normalized to sample volumes or cell numbers without comparing to a  
74 reference gene (referred to as “absolute quantification”) have also been applied in some cases,  
75 especially when evaluating the stabilities of housekeeping genes (Vandecasteele *et al.*, 2001). In  
76 our study, due to the difficulties in identifying a good internal standard, we employed absolute  
77 quantification. We first evaluated the variation in RNA extraction and RT-qPCR, since these two  
78 steps are expected to be the major sources of variation across samples. Replicated extractions of  
79 8 different samples indicated a good reproducibility of RNA yield, with an average coefficient of  
80 variation (CV) of 7%. A subset of these samples with replicated extractions was used in  
81 downstream RT-qPCR, with primer sets targeting *cbb3*-COX, *ppk1*-IA, *ppk1*-IIA, and 16S rRNA  
82 genes. For these primer sets, an average CV of 21% was obtained from the overall analyses. By  
83 partitioning the variance from the ANOVA (Analysis of Variance), we found that the RNA  
84 extraction and reverse transcription steps contributed to 41% of the total observed variance on  
85 average, while the remaining 59% was contributed by qPCR step alone. The results indicated  
86 that the variance from RNA extraction and reverse transcription is acceptable, particularly when  
87 comparing fold changes. Therefore, in this study, we used quantification normalized to the  
88 starting sludge volume.

Trina McMahon 6/14/10 9:54 PM  
**Deleted:** and

Trina McMahon 6/14/10 9:54 PM  
**Deleted:** . The

Trina McMahon 6/14/10 9:54 PM  
**Deleted:** arising from the RT-qPCR step

Trina McMahon 6/14/10 9:54 PM  
**Deleted:** 9% and the average CV resulted

Trina McMahon 6/14/10 9:54 PM  
**Deleted:** analysis (starting from biomass collection)

Trina McMahon 6/14/10 9:54 PM  
**Deleted:** transcript quantification)

Trina McMahon 6/14/10 9:54 PM  
**Deleted:** 13%

Trina McMahon 6/14/10 9:54 PM  
**Deleted:** variation

### 91 Changes in 16S rRNA abundance across a cycle

92 As anticipated, the 16S rRNA level changed during an EBPR cycle, since bacteria regulate their  
93 ribosome content by the growth rate, stringent response to amino-acid starvation, and other  
94  
95

96 mechanisms (Nomura *et al.*, 1984). *Accumulibacter* 16S rRNA levels doubled during the  
97 anaerobic phase, and except for a short increase lasting for about 35 min in the beginning of  
98 aerobic phase, levels decreased during the remaining aerobic phase. Its anaerobic increase is  
99 indeed surprising, because EBPR metabolic models suggest PAO growth only occurs in the  
100 aerobic phase, due to the high energy cost, which is more likely to be provided under aerobic  
101 conditions. It is not clear whether the increase is simply associated with cells synthesizing a large  
102 amount of enzymes necessary for rapid anaerobic acetate-uptake and transformation, or with  
103 some other mechanisms. A preliminary study showed that the transcription of *relA* (the synthase  
104 of (p)ppGpp, a global stringent response regulator), was negatively correlated to 16S rRNA  
105 during the majority of EBPR cycle (correlation coefficient = -0.83, n = 14) (data not shown).  
106 This might indicate some stringent control mechanism during EBPR. Such stringent control  
107 could promote cyclical turnover and re-synthesis of ribosomes (including rRNA), leading to the  
108 observed but otherwise unanticipated changes in 16S rRNA levels. Further study is needed to  
109 elucidate the mechanism.

#### **Observed difference in *phaA* and *phaC* regulation**

110  
111  
112  
113 In *Accumulibacter*, genes *phaC* (included in our study) and *phaE* form an operon, encoding the  
114 two subunits of the heterodimeric Class III PHA synthase, respectively. Gene *phaA* (included in  
115 our study), encoding acetyl-CoA acetyltransferase, is located in an adjacent operon downstream,  
116 in the same transcriptional direction as *phaCE*. In *Cyanothece sp.* PCC 7425, to which this *phaC*  
117 has the highest similarity, these genes are in a single operon. While in *Accumulibacter*, two short  
118 genes (both encoding MaoC domain protein dehydratases) are in the same operon with *phaA*,

119 [separating phaA and phaC into two operons. Downstream of the phaA-containing operon, a](#)  
120 [different phaC gene encoding class I PHA synthase forms a separate transcriptional unit in the](#)  
121 [opposite direction to phaA. These operon structures are very interesting although the](#)  
122 [implications for expression in Accumulibacter are not clear. In \*Aeromonas caviae\*, a similar](#)  
123 [MaoC domain was also found downstream of phaC, and exhibited \(\*R\*\)-specific enoyl-CoA](#)  
124 [hydratase activity and played a role in channeling \(\*R\*\)-3-hydroxyacyl-CoA monomer from  \$\beta\$ -](#)  
125 [oxidation of fatty acid to PHA synthesis \(Fukui \*et al.\*, 1998\). This might suggest that the phaA](#)  
126 [investigated in our study might also be involved in fatty acid metabolism, in addition to PHA](#)  
127 [biosynthesis, thus subjecting to a separate regulation from phaC. The potential relationship](#)  
128 [between fatty acid and PHA metabolisms is of particular interest since Wilmes \*et al.\* \(2008\)](#)  
129 [proposed a role of fatty acid  \$\beta\$ -oxidation in EBPR metabolism. Further experimental](#)  
130 [investigation is needed to elucidate this.](#)

**Table S1. Summary of genes with the closest match to clade IIA**

| Gene                                                                              | IMG/M<br>OID of IIA        | Closest match to IIA in<br>sludge metagenome |                               | Closest match to IIA in Genbank (non-Accumulibacter) |                               |
|-----------------------------------------------------------------------------------|----------------------------|----------------------------------------------|-------------------------------|------------------------------------------------------|-------------------------------|
|                                                                                   |                            | OID of non-<br>IIA homolog                   | ID <sup>1</sup> to IIA<br>(%) | Organism                                             | ID <sup>1</sup> to IIA<br>(%) |
| <a href="#">Pyruvate dehydrogenase complex</a>                                    | <a href="#">2001099980</a> | <a href="#">2001086930</a>                   | <a href="#">92.31</a>         | <a href="#">Dechloromonas aromatica RCB</a>          | <a href="#">81.76</a>         |
| <a href="#">Pyruvate synthase (pyruvate flavodoxin/ferredoxin oxidoreductase)</a> | 2001062970                 | 2001144560                                   | 92.96                         | Rhodoferrax ferrireducens T118                       | 71.21                         |
| <a href="#">Citrate synthase</a>                                                  | 2001061560                 | 2001103000                                   | 94.66                         | Azoarcus sp. EbN1                                    | 84.85                         |
| <a href="#">Isocitrate lyase</a>                                                  | <a href="#">2001006860</a> | <a href="#">2000000540</a>                   | <a href="#">100</a>           | <a href="#">Dechloromonas aromatica RCB</a>          | <a href="#">89.81</a>         |
|                                                                                   |                            | <a href="#">2000224990</a>                   | <a href="#">99.22</a>         |                                                      |                               |
| <a href="#">Succinate dehydrogenase/fumarate reductase, Fe-S protein subunit</a>  | 2001061540                 | 2000037440                                   | 98.3                          | Dechloromonas aromatica RCB                          | 85.65                         |
| <a href="#">Fumarate reductase subunit C</a>                                      | <a href="#">2001024420</a> | <a href="#">2001036520</a>                   | <a href="#">80.3</a>          | <a href="#">Chromobacterium violaceum ATCC 12472</a> | <a href="#">64.39</a>         |
| <a href="#">Methylmalonyl-CoA mutase, N-terminal domain/subunit</a>               | <a href="#">2001062840</a> | <a href="#">2000234230</a>                   | <a href="#">90.55</a>         | <a href="#">Nocardioides sp. JS614</a>               | <a href="#">65.12</a>         |
|                                                                                   |                            | <a href="#">2000052210</a>                   | <a href="#">84.09</a>         |                                                      |                               |
| <a href="#">Acetyl-CoA acetyltransferase</a>                                      | <a href="#">2001070320</a> | <a href="#">2001139020</a>                   | <a href="#">91.11</a>         | <a href="#">Chromobacterium violaceum ATCC 12472</a> | <a href="#">64.19</a>         |
| <a href="#">Poly(3-hydroxyalkanoate) synthetase</a>                               | 2001070280                 | 2000319730                                   | 99.73                         | Cyanothece sp. PCC 7425                              | 47.45                         |
| <a href="#">Heme/copper-type cytochrome/quinol oxidases, subunit 1</a>            | 2001010230                 | 2000086280                                   | 99.41                         | Dechloromonas aromatica RCB                          | 87.29                         |
| <a href="#">Cbb3-type cytochrome oxidase, subunit 1</a>                           | <a href="#">2001063240</a> | <a href="#">2001042560</a>                   | <a href="#">97.4</a>          | <a href="#">Azoarcus sp. BH72</a>                    | <a href="#">87.32</a>         |
| <a href="#">Nitrous oxide reductase</a>                                           | <a href="#">2001002170</a> | <a href="#">2001100970</a>                   | <a href="#">90.79</a>         | <a href="#">Dechloromonas aromatica RCB</a>          | <a href="#">90.05</a>         |
|                                                                                   |                            | <a href="#">2000131850</a>                   | <a href="#">97.76</a>         |                                                      |                               |

<sup>1</sup> Percentage of DNA sequence identity

Trina McMahon 6/14/10 9:54 PM  
Formatted ... [1]  
Trina McMahon 6/14/10 9:54 PM  
Formatted Table ... [2]  
Trina McMahon 6/14/10 9:54 PM  
Deleted: Fumarate reductase subunit C  
Trina McMahon 6/14/10 9:54 PM  
Formatted ... [3]  
Trina McMahon 6/14/10 9:54 PM  
Deleted: 2001024420... ... [4]  
Trina McMahon 6/14/10 9:54 PM  
Formatted ... [5]  
Trina McMahon 6/14/10 9:54 PM  
Formatted Table ... [6]  
Trina McMahon 6/14/10 9:54 PM  
Formatted ... [7]  
Trina McMahon 6/14/10 9:54 PM  
Formatted Table ... [8]  
Trina McMahon 6/14/10 9:54 PM  
Formatted ... [9]  
Trina McMahon 6/14/10 9:54 PM  
Deleted: Acetyl-CoA acetyltransferase  
Trina McMahon 6/14/10 9:54 PM  
Formatted ... [10]  
Trina McMahon 6/14/10 9:54 PM  
Deleted: 2001070320  
Trina McMahon 6/14/10 9:54 PM  
Formatted ... [11]  
Trina McMahon 6/14/10 9:54 PM  
Deleted: 2001139020  
Trina McMahon 6/14/10 9:54 PM  
Formatted ... [12]  
Trina McMahon 6/14/10 9:54 PM  
Deleted: 91.11  
Trina McMahon 6/14/10 9:54 PM  
Formatted ... [13]  
Trina McMahon 6/14/10 9:54 PM  
Deleted: Chromobacterium violaceum ... [14]  
Trina McMahon 6/14/10 9:54 PM  
Formatted ... [15]  
Trina McMahon 6/14/10 9:54 PM  
Deleted: 64.19  
Trina McMahon 6/14/10 9:54 PM  
Formatted ... [16]  
Trina McMahon 6/14/10 9:54 PM  
Formatted ... [17]  
Trina McMahon 6/14/10 9:54 PM  
Formatted ... [18]  
Trina McMahon 6/14/10 9:54 PM  
Formatted ... [19]  
Trina McMahon 6/14/10 9:54 PM  
Formatted Table ... [20]  
Trina McMahon 6/14/10 9:54 PM

1 **Supplementary Figure Legend**

2 **Figure S1.** Transcription profiles during a normal EBPR cycle. The y-axis shows the normalized  
3 transcript levels by comparison with the first time point. The maximal fold change (MFC) is the  
4 ratio of the maximal to minimal cDNA copy number during a cycle.

5  
6 **Figure S2.** A heatmap showing the clustering pattern of gene expression during an EBPR cycle,  
7 generated from the heatmap function using R software package (R Development Core Team,  
8 2008). The expression levels of each gene were indicated as the ratio to its maximal expression  
9 during a cycle in order to be at the same scale.

10  
11 **Supplementary Reference**

12 [Fukui, T., Shiomi, N., and Doi, Y. \(1998\) Expression and characterization of \(R\)-specific enoyl](#)  
13 [coenzyme A hydratase involved in polyhydroxyalkanoate biosynthesis by \*Aeromonas caviae\*. \*J.\*](#)  
14 [Bacteriol. 180: 667-673.](#)

15 [Garcia Martin, H., Ivanova, N., Kunin, V., Warnecke, F., Barry, K.W., McHardy, A.C., et al.](#)  
16 [\(2006\) Metagenomic analysis of two enhanced biological phosphorus removal \(EBPR\) sludge](#)  
17 [communities. \*Nat. Biotechnol.\* 24: 1263-1269.](#)

18  
19  
20 [Kunin, V., He, S., Warnecke, F., Peterson, S.B., Garcia Martin, H., Haynes, M., et al. \(2008\) A](#)  
21 [bacterial metapopulation adapts locally to phage predation despite global dispersal. \*Genome Res.\*](#)  
22 [18: 293-297.](#)

23  
24 [Nomura, M., Gourse, R., and Baughman, G. \(1984\) Regulation of the synthesis of ribosomes and](#)  
25 [ribosomal components. \*Annu. Rev. Biochem.\* 53: 75-117.](#)

26  
27 [R Development Core Team \(2008\) \*R: A language and environment for statistical computing.\* R](#)  
28 [Foundation for Statistical Computing, Vienna, Austria.](#)

29  
30 [Savli H, Karadenizli A, Kolayli F, Gundes S, Ozbek U, Vahaboglu H \(2003\). Expression](#)  
31 [stability of six housekeeping genes: a proposal for resistance gene quantification studies of](#)  
32 [Pseudomonas aeruginosa by real-time quantitative RT-PCR. \*J Med Microbiol\* 52: 403-408.](#)

33  
34 [Vandecasteele, S.J., Peetermans, W.E., Merckx, R., and Van Eldere, J. \(2001\) Quantification of](#)  
35 [expression of Staphylococcus epidermidis housekeeping genes with Taqman quantitative PCR](#)  
36 [during in vitro growth and under different conditions. \*J. Bacteriol.\* 183: 7094-7101.](#)

Trina McMahon 6/14/10 9:54 PM  
**Deleted:** Garcia Martin H, Ivanova N,  
Trina McMahon 6/14/10 9:54 PM  
**Deleted:** ,..... KW... AC ... [21]  
Trina McMahon 6/14/10 9:54 PM  
**Formatted:** Font:Not Italic  
Trina McMahon 6/14/10 9:54 PM  
**Formatted:** Justified, Level 2  
Trina McMahon 6/14/10 9:54 PM  
**Deleted:** :..... SB..., ... [23]  
Trina McMahon 6/14/10 9:54 PM  
**Formatted:** Font:Not Italic  
Trina McMahon 6/14/10 9:54 PM  
**Deleted:** :  
Trina McMahon 6/14/10 9:54 PM  
**Formatted:** Font:Not Bold  
Trina McMahon 6/14/10 9:54 PM  
**Deleted:** ,..... ... [24]  
Trina McMahon 6/14/10 9:54 PM  
**Formatted:** Font:Not Bold  
Trina McMahon 6/14/10 9:54 PM  
**Deleted:** :...: ... [25]  
Trina McMahon 6/14/10 9:54 PM  
**Formatted:** Justified  
Trina McMahon 6/14/10 9:54 PM  
**Formatted:** Justified, Level 2  
Trina McMahon 6/14/10 9:54 PM  
**Deleted:** SJ... WE..., ... [26]  
Trina McMahon 6/14/10 9:54 PM  
**Formatted:** Font:Not Bold



37 |  
38 | [Wilmes, P., Andersson, A.F., Lefsrud, M.G., Wexler, M., Shah, M., Zhang, B. et al. \(2008\)](#)  
39 | [Community proteogenomics highlights microbial strain-variant protein expression within](#)  
40 | [activated sludge performing enhanced biological phosphorus removal. \*ISME J.\* \*\*2\*\*: 853-864.](#)

Trina McMahon 6/14/10 9:54 PM  
**Deleted:** -  
Trina McMahon 6/14/10 9:54 PM  
**Formatted:** Justified, Line spacing: single

|                                                                     |               |                 |
|---------------------------------------------------------------------|---------------|-----------------|
| <b>Page 7: [1] Formatted</b><br>Line spacing: 1.5 lines             | Trina McMahon | 6/14/10 9:54 PM |
| <b>Page 7: [2] Change</b><br>Formatted Table                        | Trina McMahon | 6/14/10 9:54 PM |
| <b>Page 7: [3] Formatted</b><br>Portuguese                          | Trina McMahon | 6/14/10 9:54 PM |
| <b>Page 7: [4] Deleted</b><br>2001024420                            | Trina McMahon | 6/14/10 9:54 PM |
| <b>Page 7: [4] Deleted</b><br>2001036520                            | Trina McMahon | 6/14/10 9:54 PM |
| <b>Page 7: [4] Deleted</b><br>80.3                                  | Trina McMahon | 6/14/10 9:54 PM |
| <b>Page 7: [4] Deleted</b><br>Chromobacterium violaceum ATCC 12472  | Trina McMahon | 6/14/10 9:54 PM |
| <b>Page 7: [4] Deleted</b><br>64.39                                 | Trina McMahon | 6/14/10 9:54 PM |
| <b>Page 7: [5] Formatted</b><br>Font:10 pt                          | Trina McMahon | 6/14/10 9:54 PM |
| <b>Page 7: [6] Change</b><br>Formatted Table                        | Trina McMahon | 6/14/10 9:54 PM |
| <b>Page 7: [7] Formatted</b><br>Font:10 pt                          | Trina McMahon | 6/14/10 9:54 PM |
| <b>Page 7: [8] Change</b><br>Formatted Table                        | Trina McMahon | 6/14/10 9:54 PM |
| <b>Page 7: [9] Formatted</b><br>Font:10 pt                          | Trina McMahon | 6/14/10 9:54 PM |
| <b>Page 7: [10] Formatted</b><br>Font:3 pt                          | Trina McMahon | 6/14/10 9:54 PM |
| <b>Page 7: [11] Formatted</b><br>Font:3 pt                          | Trina McMahon | 6/14/10 9:54 PM |
| <b>Page 7: [12] Formatted</b><br>Font:3 pt                          | Trina McMahon | 6/14/10 9:54 PM |
| <b>Page 7: [13] Formatted</b><br>Font:3 pt                          | Trina McMahon | 6/14/10 9:54 PM |
| <b>Page 7: [14] Deleted</b><br>Chromobacterium violaceum ATCC 12472 | Trina McMahon | 6/14/10 9:54 PM |
| <b>Page 7: [15] Formatted</b><br>Font:3 pt                          | Trina McMahon | 6/14/10 9:54 PM |
| <b>Page 7: [16] Formatted</b><br>Font:3 pt                          | Trina McMahon | 6/14/10 9:54 PM |
| <b>Page 7: [17] Formatted</b>                                       | Trina McMahon | 6/14/10 9:54 PM |

Font:10 pt

|                        |               |                 |
|------------------------|---------------|-----------------|
| Page 7: [17] Formatted | Trina McMahon | 6/14/10 9:54 PM |
|------------------------|---------------|-----------------|

Font:10 pt

|                        |               |                 |
|------------------------|---------------|-----------------|
| Page 7: [17] Formatted | Trina McMahon | 6/14/10 9:54 PM |
|------------------------|---------------|-----------------|

Font:10 pt

|                      |               |                 |
|----------------------|---------------|-----------------|
| Page 7: [18] Deleted | Trina McMahon | 6/14/10 9:54 PM |
|----------------------|---------------|-----------------|

Nitrous oxide reductase

|                      |               |                 |
|----------------------|---------------|-----------------|
| Page 7: [18] Deleted | Trina McMahon | 6/14/10 9:54 PM |
|----------------------|---------------|-----------------|

2001002170

|                      |               |                 |
|----------------------|---------------|-----------------|
| Page 7: [18] Deleted | Trina McMahon | 6/14/10 9:54 PM |
|----------------------|---------------|-----------------|

2001100970

|                      |               |                 |
|----------------------|---------------|-----------------|
| Page 7: [18] Deleted | Trina McMahon | 6/14/10 9:54 PM |
|----------------------|---------------|-----------------|

90.79

|                      |               |                 |
|----------------------|---------------|-----------------|
| Page 7: [18] Deleted | Trina McMahon | 6/14/10 9:54 PM |
|----------------------|---------------|-----------------|

Dechloromonas aromatica RCB

|                      |               |                 |
|----------------------|---------------|-----------------|
| Page 7: [18] Deleted | Trina McMahon | 6/14/10 9:54 PM |
|----------------------|---------------|-----------------|

90.05

|                      |               |                 |
|----------------------|---------------|-----------------|
| Page 7: [19] Deleted | Trina McMahon | 6/14/10 9:54 PM |
|----------------------|---------------|-----------------|

|            |       |
|------------|-------|
| 2000131850 | 97.76 |
|------------|-------|

|                     |               |                 |
|---------------------|---------------|-----------------|
| Page 7: [20] Change | Trina McMahon | 6/14/10 9:54 PM |
|---------------------|---------------|-----------------|

Formatted Table

|                      |               |                 |
|----------------------|---------------|-----------------|
| Page 8: [21] Deleted | Trina McMahon | 6/14/10 9:54 PM |
|----------------------|---------------|-----------------|

,

|                      |               |                 |
|----------------------|---------------|-----------------|
| Page 8: [21] Deleted | Trina McMahon | 6/14/10 9:54 PM |
|----------------------|---------------|-----------------|

,

|                      |               |                 |
|----------------------|---------------|-----------------|
| Page 8: [21] Deleted | Trina McMahon | 6/14/10 9:54 PM |
|----------------------|---------------|-----------------|

KW

|                      |               |                 |
|----------------------|---------------|-----------------|
| Page 8: [21] Deleted | Trina McMahon | 6/14/10 9:54 PM |
|----------------------|---------------|-----------------|

AC

|                      |               |                 |
|----------------------|---------------|-----------------|
| Page 8: [22] Deleted | Trina McMahon | 6/14/10 9:54 PM |
|----------------------|---------------|-----------------|

.

|                      |               |                 |
|----------------------|---------------|-----------------|
| Page 8: [22] Deleted | Trina McMahon | 6/14/10 9:54 PM |
|----------------------|---------------|-----------------|

|                      |               |                 |
|----------------------|---------------|-----------------|
| Page 8: [23] Deleted | Trina McMahon | 6/14/10 9:54 PM |
|----------------------|---------------|-----------------|

,

|                      |               |                 |
|----------------------|---------------|-----------------|
| Page 8: [23] Deleted | Trina McMahon | 6/14/10 9:54 PM |
|----------------------|---------------|-----------------|

,

|                      |               |                 |
|----------------------|---------------|-----------------|
| Page 8: [23] Deleted | Trina McMahon | 6/14/10 9:54 PM |
|----------------------|---------------|-----------------|

,

|                      |               |                 |
|----------------------|---------------|-----------------|
| Page 8: [23] Deleted | Trina McMahon | 6/14/10 9:54 PM |
|----------------------|---------------|-----------------|

SB

|                      |               |                 |
|----------------------|---------------|-----------------|
| Page 8: [23] Deleted | Trina McMahon | 6/14/10 9:54 PM |
|----------------------|---------------|-----------------|

,

|                      |               |                 |
|----------------------|---------------|-----------------|
| Page 8: [24] Deleted | Trina McMahon | 6/14/10 9:54 PM |
|----------------------|---------------|-----------------|

,

|                      |               |                 |
|----------------------|---------------|-----------------|
| Page 8: [24] Deleted | Trina McMahon | 6/14/10 9:54 PM |
|----------------------|---------------|-----------------|

,

|                      |               |                 |
|----------------------|---------------|-----------------|
| Page 8: [24] Deleted | Trina McMahon | 6/14/10 9:54 PM |
|----------------------|---------------|-----------------|

.

|                      |               |                 |
|----------------------|---------------|-----------------|
| Page 8: [25] Deleted | Trina McMahon | 6/14/10 9:54 PM |
|----------------------|---------------|-----------------|

.

|                      |               |                 |
|----------------------|---------------|-----------------|
| Page 8: [25] Deleted | Trina McMahon | 6/14/10 9:54 PM |
|----------------------|---------------|-----------------|

:

|                      |               |                 |
|----------------------|---------------|-----------------|
| Page 8: [26] Deleted | Trina McMahon | 6/14/10 9:54 PM |
|----------------------|---------------|-----------------|

SJ

|                      |               |                 |
|----------------------|---------------|-----------------|
| Page 8: [26] Deleted | Trina McMahon | 6/14/10 9:54 PM |
|----------------------|---------------|-----------------|

WE

|                      |               |                 |
|----------------------|---------------|-----------------|
| Page 8: [26] Deleted | Trina McMahon | 6/14/10 9:54 PM |
|----------------------|---------------|-----------------|

,

|                      |               |                 |
|----------------------|---------------|-----------------|
| Page 8: [26] Deleted | Trina McMahon | 6/14/10 9:54 PM |
|----------------------|---------------|-----------------|

.
